# Supplementary material for: A Targeted and Tailored eHealth Weight Loss Program for Young Women: The Be Positive Be Healthe Randomized Controlled Trial
Source: PubMed Central journal article supplement (PMC6023329; doi:10.3390/healthcare6020039), 2018-05-02
Supplement: healthcare-06-00039-s001.pdf [file healthcare-06-00039-s001.pdf]

**Supplementary Table 1.** Primary and secondary outcome changes in young women (n=43) who completed the Be Positive Be Health 6-month weight loss program randomised controlled trial from baseline to 6 months.

| Outcome                         | Mean change from baseline to 6-months (95%CI) |         |                      |         | Mean difference between groups (95% CI) | Group x Time P-value | Effect size |
|---------------------------------|-----------------------------------------------|---------|----------------------|---------|-----------------------------------------|----------------------|-------------|
|                                 | Control (n=21)                                | p-value | Intervention (n=22)  | p-value |                                         |                      |             |
| Weight (kg) <sup>1</sup>        | 0.03 (-1.68, 1.74)                            | 0.974   | -1.87 (-3.54, -0.20) | 0.028   | -1.90 (-4.29, 0.49)                     | 0.119                | -0.20       |
| Weight (kg) <sup>2</sup>        | 0.51 (-1.34, 2.35)                            | 0.592   | -1.83 (-3.91, 0.25)  | 0.084   | -2.34 (-5.12, 0.45)                     | 0.100                | -0.24       |
| BMI (kg/m <sup>2</sup> )        | -0.01 (-0.66, 0.64)                           | 0.977   | -0.69 (-1.32, -0.05) | 0.034   | -0.68 (-1.58, 0.23)                     | 0.143                | -0.27       |
| Body fat (kg)                   | 0.46 (-1.39, 2.30)                            | 0.627   | -1.75 (-3.83, 0.32)  | 0.098   | -2.21 (-4.99, 0.57)                     | 0.119                | -0.32       |
| Body fat (%)                    | 0.03 (-1.6, 1.7)                              | 0.970   | -1.3 (-3.2, 0.5)     | 0.152   | -1.4 (-3.8, 1.1)                        | 0.273                | -0.23       |
| Waist circumference (cm)        | -3.4 (-5.1, -1.8)                             | <0.001  | -4.4 (-6.2, -2.5)    | <0.001  | -0.9 (-3.4, 1.5)                        | 0.459                | -0.11       |
| Systolic blood pressure (mmHg)  | -1.0 (-3.6, 1.7)                              | 0.484   | -3.8 (-6.8, -0.8)    | 0.013   | -2.9 (-6.8, 1.1)                        | 0.161                | -0.33       |
| Diastolic blood pressure (mmHg) | -1.2 (-3.4, 1.1)                              | 0.300   | -3.2 (-5.7, -0.6)    | 0.014   | -2.0 (-5.4, 1.4)                        | 0.250                | -0.24       |
| Total cholesterol               | -0.1 (-0.5, 0.3)                              | 0.648   | -0.5 (-0.9, -0.1)    | 0.014   | -0.4 (-0.9, 0.1)                        | 0.143                | -0.41       |
| LDL-C <sup>3</sup>              | -0.1 (-0.5, 0.3)                              | 0.651   | -0.3 (-0.7, 0.02)    | 0.068   | -0.2 (-0.8, 0.3)                        | 0.430                | -0.29       |
| HDL-C <sup>4</sup>              | 0.1 (-0.1, 0.2)                               | 0.197   | -0.1 (-0.3, 0.004)   | 0.057   | -0.2 (-0.4, -0.03)                      | 0.023                | -0.44       |
| Triglycerides                   | -0.2 (-0.5, 0.03)                             | 0.088   | -0.1 (-0.3, 0.2)     | 0.640   | 0.2 (-0.2, 0.5)                         | 0.401                | 0.32        |
| MVPA minutes/ week <sup>5</sup> | 20 (-121, 161)                                | 0.784   | -39 (-175, 97)       | 0.575   | -59 (-254, 137)                         | 0.557                | -0.24       |
| MPA minutes/week                | 65 (-32, 162)                                 | 0.189   | -4 (-98, 90)         | 0.932   | -69 (-204, 66)                          | 0.315                | -0.49       |
| VPA minutes/week                | -49 (-116, 17)                                | 0.145   | -35 (-100, 30)       | 0.293   | 15 (-78, 107)                           | 0.759                | 0.10        |
| Sitting time weekday (mins/day) | -78 (-178, 23)                                | 0.129   | -10 (-111, 92)       | 0.850   | 68 (-75, 211)                           | 0.351                | 0.28        |
| Sitting time weekend (mins/day) | -65 (-176, 46)                                | 0.250   | -64 (-172, 44)       | 0.246   | 1 (-154, 156)                           | 0.991                | 0.00        |
| Total sitting time (mins/day)   | -71 (-158, 16)                                | 0.109   | -26 (-114, 62)       | 0.559   | 45 (-79, 168)                           | 0.476                | 0.22        |
| Energy intake (kJ/day)          | -191 (-1484, 1102)                            | 0.772   | -982 (-2215, 251)    | 0.119   | -791 (-2578, 996)                       | 0.386                | -0.21       |
| Fruit (% energy/day)            | -0.60 (-2.10, 0.90)                           | 0.433   | 1.14 (-0.29, 2.57)   | 0.119   | 1.74 (-0.33, 3.81)                      | 0.100                | 0.45        |
| Fruit (grams/day)               | 10.08 (-20.40, 40.55)                         | 0.517   | 35.55 (6.49, 64.61)  | 0.016   | 25.48 (-16.64, 67.59)                   | 0.236                | 0.31        |

|                                |                                    |       |                       |       |                        |       |       |
|--------------------------------|------------------------------------|-------|-----------------------|-------|------------------------|-------|-------|
| Vegetable (% energy/day)       | -1.55 (-3.46, 0.36)                | 0.111 | 2.91 (1.09, 4.73)     | 0.002 | 4.46 (-1.82, 7.10)     | 0.001 | 0.92  |
| Vegetable grams/day            | 15.43 (-38.33, 69.18)              | 0.574 | 57.05 (5.80, 108.31)  | 0.029 | 41.63 (-32.64, 115.90) | 0.272 | 0.19  |
| Alcohol (% energy/day)         | 5.55e <sup>-17</sup> (-0.32, 0.32) | 1.000 | -0.14 (-0.44, 0.17)   | 0.383 | -0.14 (-0.58, 0.31)    | 0.547 | -0.14 |
| Alcohol (grams/day)            | 0.33 (-0.15, 0.80)                 | 0.180 | -0.36 (-0.82, 0.09)   | 0.119 | -0.69 (-1.34, 0.03)    | 0.041 | -0.38 |
| Takeaway (% energy/day)        | 0.30 (-0.93, 1.53)                 | 0.634 | -1.36 (-2.54, -0.19)  | 0.023 | -1.66 (-3.37, 0.04)    | 0.056 | -0.48 |
| % energy from non-core foods   | 1.0 (-4.93, 6.93)                  | 0.741 | -7.36 (-13.01, -1.71) | 0.011 | -8.36 (-16.55, 0.18)   | 0.045 | -0.67 |
| % energy from core foods       | -1.0 (-6.95, 4.95)                 | 0.742 | 7.50 (1.83, 13.17)    | 0.010 | 8.50 (-0.28, 16.72)    | 0.043 | 0.68  |
| QLESQ total score <sup>6</sup> | 1.8 (-1.7, 5.3)                    | 0.312 | 2.8 (-0.6, 6.2)       | 0.107 | 1.0 (-3.9, 5.9)        | 0.687 | 0.12  |
| Satisfaction with life scale   | 0.6 (-1.3, 2.5)                    | 0.530 | 0.2 (-1.6, 2.0)       | 0.844 | -0.4 (-3.0, 2.2)       | 0.751 | -0.27 |

---

<sup>1</sup> Weight including self-report, <sup>2</sup> Measured weight only, <sup>3</sup> Low density lipoprotein cholesterol, <sup>4</sup> High density lipoprotein cholesterol, <sup>5</sup> Moderate-vigorous physical activity, <sup>6</sup> Quality of Life, Enjoyment & Satisfaction Questionnaire
